# Supplementary material for: Topological sorting of magnetic colloidal bipeds
Source: Royal Society of Chemistry journal article supplement (doi:10.1039/d4sm01480d), 2025-01-01
Supplement: d4sm01480d3.pdf [file d4sm01480d3.pdf]

## Description of Additional Supplementary Files

### Topological sorting of magnetic colloidal bipeds

Aneena Rinu Perayil,<sup>1</sup> Daniel de las Heras,<sup>1</sup> Thomas M. Fischer,<sup>1,\*</sup> Piotr Kuświk,<sup>2</sup>  
Feliks Stobiecki,<sup>2</sup> Maciej Urbaniak,<sup>2</sup> Sapida Akhundzada,<sup>3</sup> and Arno Ehresmann<sup>3</sup>

<sup>1</sup>*Institute of Physics, Universität Bayreuth, Bayreuth 95440 Germany.*

<sup>2</sup>*Institute of Molecular Physics, Polish Academy of Sciences, 60-179 Poznań, Poland.*

<sup>3</sup>*Institute of Physics and Center for Interdisciplinary Nanostructure Science  
and Technology (CINSaT), University of Kassel, D-34132 Kassel, Germany*

(Dated: March 20, 2025)

This PDF file includes:

Description of Supplementary Video 1 to 2

Description of Supplementary Data 1

## MOVIE FILES

**File Name: Supplementary Video 1**

**Description:** Supplementary video 1 shows the sorting of bipeds of length  $b_3, b_4, b_5, b_6$  and  $b_8$  and the resorting after a biped addition reaction. Supplementary video 1 is speeded up by a factor of 50.

**File Name: Supplementary Video 2**

**Description:** Supplementary video 2 shows the sorting of bipeds of length  $b_7$  toward its attractor line. Supplementary video 2 is speeded up by a factor of 70.

**File Name: Supplementary Data 1**

**Description:** Excel Data sheet for Fig. 5
