# Supplementary material for: Topological sorting of magnetic colloidal bipeds
Source: Royal Society of Chemistry journal article supplement (doi:10.1039/d4sm01480d), 2025-01-01
Supplement: d4sm01480d5.xlsx [file d4sm01480d5.xlsx]

## Sheet: Sheet1
bn	a	phi<	phi>	lambda		beta
					5% of lambda
3	7.75	35	75	0.84202	0.042101	0.621683	0.1
4	9.38	35	75	0.84202	0.042101	0.684867	0.1
5	12.39	35	75	0.84202	0.042101	0.648109	0.1
6	14.44	35	75	0.84202	0.042101	0.667319	0.1
7	17.66	35	75	0.84202	0.042101	0.636585	0.1
8	20.09	35	75	0.84202	0.042101	0.639528	0.1		0	1
									2	1
5	8.18	35	75	0.84202	0.042101	0.981671
6	8.2	35	75	0.84202	0.042101	1.17513	0.2
7	9.38	35	75	0.84202	0.042101	1.19852	0.2
8	9.38	35	75	0.84202	0.042101	1.36973	0.5
		90	90
3	7.75	25	85	1.1786	0.0589299	0.458064	0.1
4	10.5	25	85	1.1786	0.0589299	0.450793	0.1
5	14.46	25	85	1.1786	0.0589299	0.409174	0.1
6	6.53	25	85	1.1786	0.0589299	1.08729	0.1
7	6.58	25	85	1.1786	0.0589299	1.25886	0.1
8		25	85	1.1786	0.0589299		0.1
6		25	85	1.1786	0.0589299		0.1
7		25	85	1.1786	0.0589299		0.1
8		25	85	1.1786	0.0589299		0.1
3		25	40	0.760483	0.0380241		0.1
4	6.72	25	40	0.760483	0.0380241	0.704364	0.1
5	7.75	25	40	0.760483	0.0380241	0.763439	0.1
6	8.2	25	40	0.760483	0.0380241	0.865852	0.1
7	12.39	25	40	0.760483	0.0380241	0.668549	0.1
8		25	40	0.760483	0.0380241		0.1
3		35	50	0.667779	0.0333889		0.1
4		35	50	0.667779	0.0333889		0.1
5		35	50	0.667779	0.0333889		0.2
3	6.836	35	50	0.667779	0.0333889	0.704804
4	8.2	35	50	0.667779	0.0333889	0.783421
5	12.39	35	50	0.667779	0.0333889	0.648109
6		35	50	0.667779	0.0333889
7		35	50	0.667779	0.0333889
8		35	50	0.667779	0.0333889
